# Supplementary material for: Inhibition performance of halogen-substituted benzaldehyde thiosemicarbazones as corrosion inhibitors for mild steel in hydrochloric acid solution
Source: Royal Society of Chemistry journal article supplement (doi:10.1039/d2ra05690a), 2022-01-01
Supplement: d2ra05690a1.pdf [file d2ra05690a1.pdf]

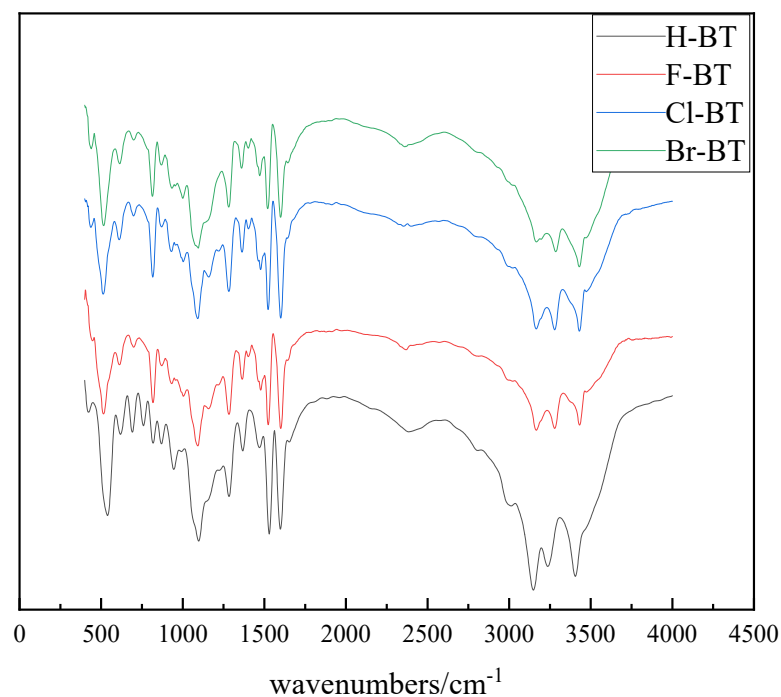

Fig.S1. FT-IR of the synthesized benzaldehyde thiosemicarbazone derivatives.

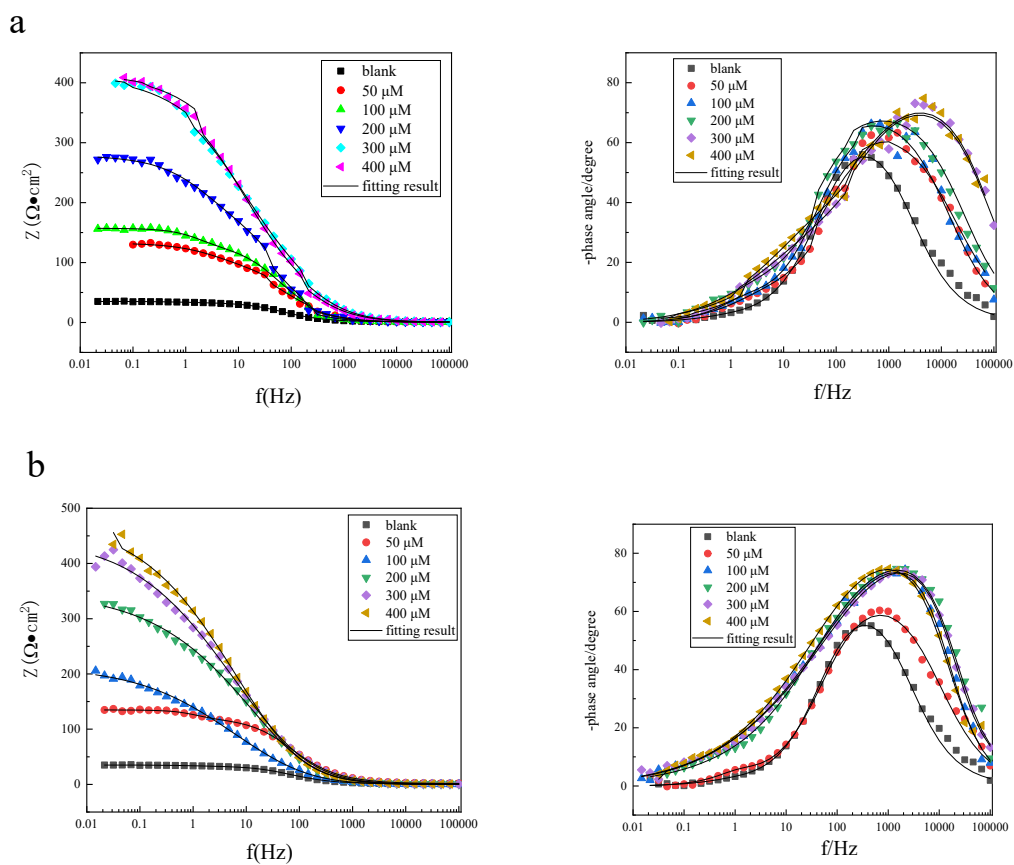

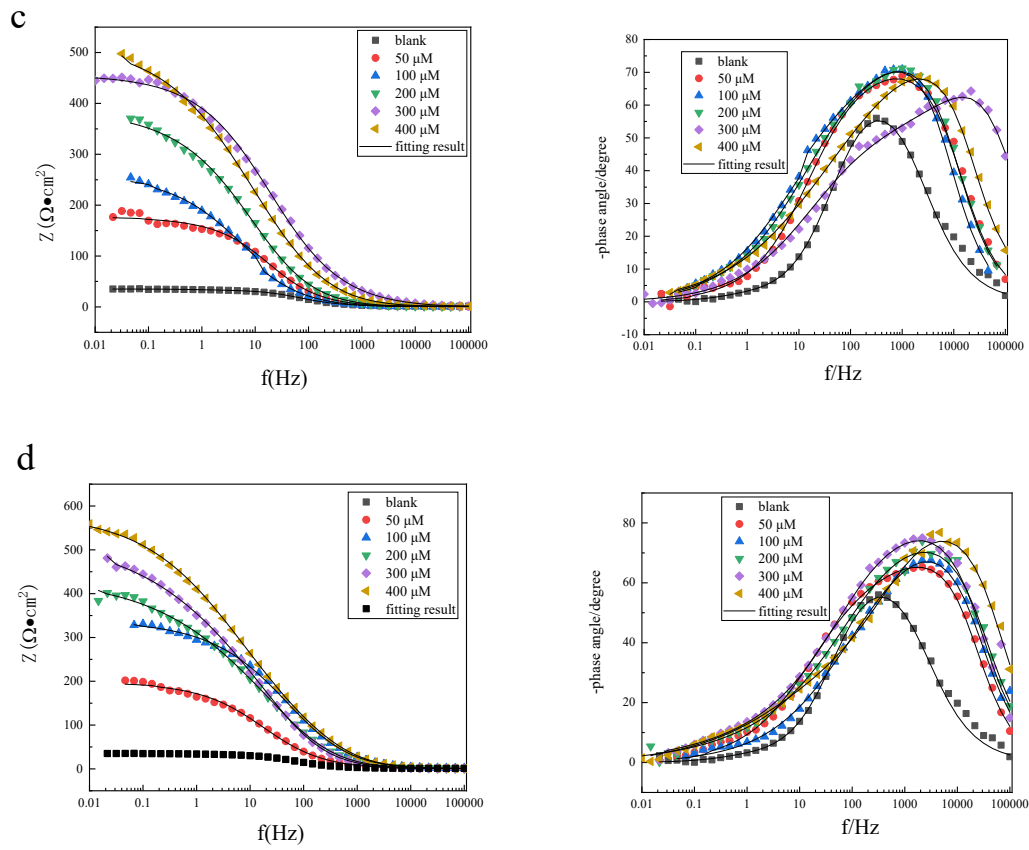

**Fig.S2.** Bode plots of mild steel in 1.0 M HCl solution without and with different concentrations of benzaldehyde thiosemicarbazone derivatives at 303 K. (a) H-BT, (b) F-BT, (c) Cl-BT, (d) Br-BT.

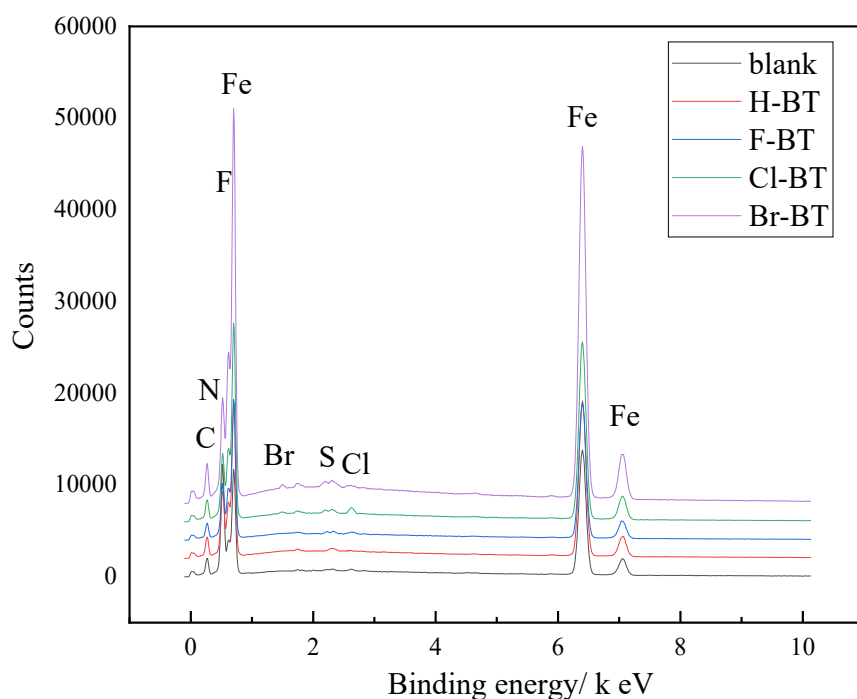

**Fig.S3.** EDX spectra of mild steel surface immersed in 1.0 M HCl solution for 8 h at 303 K

(a) without, with (b) 400  $\mu$ M H-BT, (c) 400  $\mu$ M F-BT, (d) 400  $\mu$ M Cl-BT, (e) 400  $\mu$ M Br-BT.

**Table S1.** EDX spectra results of Q235 mild steel surface immersed in 1.0 M HCl solution for 8 h at 303 K (a) without, with (b) 400  $\mu$ M H-BT, (c) 400  $\mu$ M F-BT, (d) 400  $\mu$ M Cl-BT, (e) 400  $\mu$ M Br-BT.

| Inhibitor | Fe<br>At% | C<br>At% | N<br>At% | S<br>At% | F<br>At% | Cl<br>At% | Br<br>At% |
|-----------|-----------|----------|----------|----------|----------|-----------|-----------|
| Blank     | 70.1      | 29.9     | -        | -        | -        | -         | -         |
| H-BT      | 68.1      | 26.5     | 3.3      | 2.1      | -        | -         | -         |
| F-BT      | 66.3      | 25.4     | 4.6      | 2.4      | 1.3      |           | -         |
| Cl-BT     | 64.8      | 25.9     | 4.3      | 2.3      | -        | 2.7       | -         |
| Br-BT     | 65.5      | 25.7     | 4.7      | 2.6      |          |           | 1.5       |
